# Supplementary material
Source: PubMed Central journal article supplement (PMC514470)

a

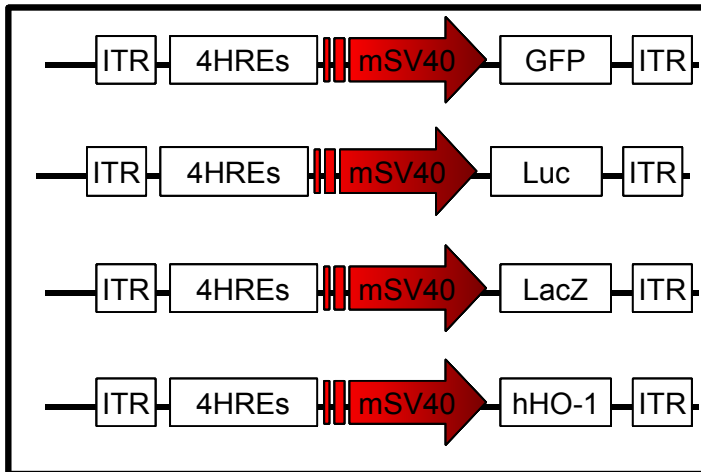

Supplement: pnas_101_33_12282__1.pdf [file pnas_101_33_12282__1.pdf]

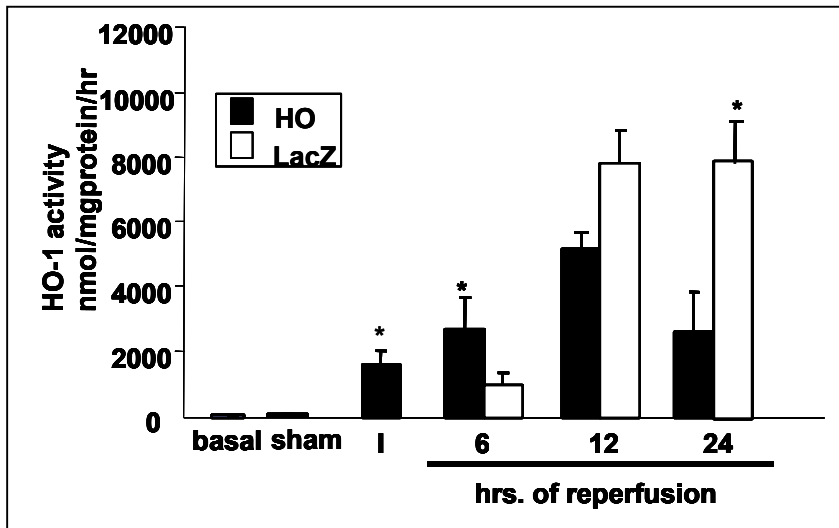

Supplement: pnas_101_33_12282__2.pdf [file pnas_101_33_12282__2.pdf]

**4HRE-mSV40-hHO-1**

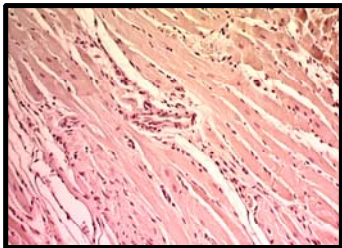

**basal**

**4HRE-mSV40-LacZ**

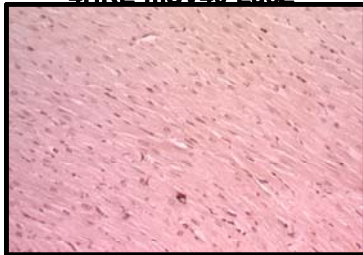

**4HRE-mSV40-hHO-1**

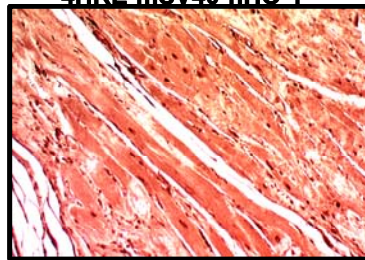

**1hr Ischemia alone**

Supplement: pnas_101_33_12282__3.pdf [file pnas_101_33_12282__3.pdf]
